# Supplementary material for: Investigation of the Transcriptomic Response of Atlantic Salmon (Salmo Salar) Exposed to Paramoeba Perurans Using Next Generation Sequencing
Source: Research Square preprint supplement (doi:10.21203/rs.3.rs-142213/v1), 2021-01-22
Supplement: Supplementary file 1 [file ead47a33ebd4b613fa88fadb.docx]

Investigation of the transcriptomic response of Atlantic salmon (*Salmo salar*) exposed to *Paramoeba perurans* using Next Generation Sequencing.

Anita Talbot1*, Laura Gargan2, Grainne Moran1, Louis Prudent1, Ian O’Connor1, Luca Mirimin1, Jens Carlsson2,Eugene MacCarthy1

Affiliation: Galway Mayo Institute of Technology1, University College Dublin2.

**Supplementary Tables**

Supplementary Table S1. Reads mapped to the Atlantic salmon (*Salmo salar)* reference genome

| Sample | No. raw reads | %GC | No. clean paired reads | % clean paired reads | No. aligned fragments (HISAT2) | % aligned (HISAT2) | No. assigned fragments (featureCounts) |
| --- | --- | --- | --- | --- | --- | --- | --- |
| 0 dpi_F1 | 23,705,616 | 47 | 21,788,776 | 91.91 | 20,939,014 | 96.1 | 17,067,854 |
| 0 dpi_F2 | 31,513,874 | 48 | 29,303,994 | 92.99 | 28,339,893 | 96.71 | 23,108,152 |
| 0 dpi_F3 | 29,391,335 | 49 | 27,346,835 | 93.04 | 26,015,044 | 95.13 | 21,097,194 |
| 0 dpi_F4 | 31,983,472 | 48 | 30,118,436 | 94.17 | 29,115,492 | 96.67 | 23,450,006 |
| 0 dpi_F5 | 27,085,439 | 48 | 25,112,221 | 92.71 | 24,263,428 | 96.62 | 19,770,449 |
| 0 dpi_F6 | 35,446,789 | 48 | 32,947,046 | 92.95 | 31,754,363 | 96.38 | 25,173,681 |
| 4dpi_F1 | 33,141,070 | 48 | 30,776,783 | 92.87 | 29,653,430 | 96.35 | 23,601,837 |
| 4dpi _F2 | 24,119,697 | 46 | 22,182,174 | 91.97 | 21,093,029 | 95.09 | 15,109,383 |
| 4dpi _F3 | 25,447,276 | 48 | 23,627,834 | 92.85 | 22,630,739 | 95.78 | 18,375,060 |
| 4dpi _F4 | 28,777,537 | 48 | 26,848,741 | 93.30 | 25,726,464 | 95.82 | 20,579,372 |
| 4dpi _F5 | 32,267,776 | 48 | 29,765,296 | 92.24 | 27,151,903 | 91.22 | 21,229,599 |
| 4dpi _F6 | 29,916,718 | 48 | 27,653,002 | 92.43 | 26,541,351 | 95.98 | 20,957,105 |
| 7dpi _F1 | 22,724,108 | 48 | 21,184,663 | 93.23 | 20,286,433 | 95.76 | 16,651,379 |
| 7dpi _F2 | 24,216,542 | 49 | 22,803,694 | 94.17 | 21,627,023 | 94.84 | 17,231,475 |
| 7dpi _F3 | 25,370,044 | 49 | 23,176,833 | 91.36 | 22,358,691 | 96.47 | 17,403,859 |
| 7dpi _F4 | 25,830,010 | 48 | 23,560,194 | 91.21 | 21,390,300 | 90.79 | 17,514,492 |
| 7dpi _F5 | 22,356,856 | 49 | 21,169,816 | 94.69 | 19,821,299 | 93.63 | 16,231,978 |
| 7dpi _F6 | 27,854,702 | 48 | 26,242,235 | 94.21 | 25,221,412 | 96.11 | 19,968,567 |
| 14dpi _F1 | 23,445,793 | 48 | 21,786,551 | 92.92 | 20,878,052 | 95.83 | 17,152,789 |
| 14dpi _F2 | 29,782,671 | 48 | 27,922,357 | 93.75 | 26,635,136 | 95.39 | 21,449,560 |
| 14dpi _F3 | 22,911,403 | 48 | 21,066,427 | 91.95 | 20,160,571 | 95.7 | 16,496,355 |
| 14dpi _F4 | 24,310,134 | 48 | 22,667,534 | 93.24 | 21,683,763 | 95.66 | 17,895,816 |
| 14dpi _F5 | 28,664,133 | 47 | 26,055,225 | 90.90 | 24,997,383 | 95.94 | 19,554,268 |
| 14dpi _F6 | 26,087,449 | 48 | 23,827,146 | 91.34 | 22,714,418 | 95.33 | 18,510,969 |
| 16dpi _F1 | 28,400,360 | 48 | 25,480,633 | 89.72 | 24,489,436 | 96.11 | 19,594,519 |
| 16dpi _F2 | 21,715,412 | 48 | 19,810,680 | 91.23 | 18,659,679 | 94.19 | 14,740,735 |
| 16dpi _F3 | 22,603,785 | 48 | 20,898,728 | 92.46 | 20,150,554 | 96.42 | 16,453,470 |
| 16dpi _F4 | 23,451,127 | 48 | 20,735,553 | 88.42 | 19,906,131 | 96 | 15,906,230 |
| 16dpi _F5 | 24,921,811 | 48 | 22,700,158 | 91.09 | 21,792,152 | 96 | 17,457,881 |
| 16dpi _F6 | 25,482,490 | 47 | 23,774,625 | 93.30 | 22,878,322 | 96.23 | 17,933,281 |

Supplementary Table S2. Primer sequences for gill Real-time PCR validation of RNA-seq data

| Gene | Accession No. | Forward Primer | Reverse primer | Amplicon size |
| --- | --- | --- | --- | --- |
| CATH-1 | [NM_001123586.1](https://www.ncbi.nlm.nih.gov/nuccore/NM_001123586.1) | aaatgggaaactaatgatgtgcagc | ggagcattttctggcttggc | 163 |
| CLR-A | [NM_001123581.1](https://www.ncbi.nlm.nih.gov/nuccore/NM_001123581.1) | actgctgaggaacagacgtt | cgtcaatgtggttgttgggc | 169 |
| CXC4 | XM_014172601.1 | gcagcagcattctcagaggt | gtctcacccctgtcttggtg | 157 |
| EF1α | NM_001123629.1 | gctgctgagatgggtaa | caaacttccacagggaaatg | 133 |
| EF1β | NM_001140954.1 | tacgccgccaagaagtcaaa | agcttggactgtccccaaag | 155 |
| IL-8 | XM_014156195.1 | tgctctaaggaagaagtcattgtca | gttgattctgacgctgttgattt | 127 |
| IL-17F | [XM_014192555.1](https://www.ncbi.nlm.nih.gov/nuccore/XM_014192555.1) | gactaccaacaccacctatg | ccaggatctggtggtaaatg | 140 |
| IRG1 | [XM_014163747.1](https://www.ncbi.nlm.nih.gov/nuccore/XM_014163747.1) | ctccagtacagccagttcttca | cagggtgccacgtatcatca | 142 |
| LECT2 | [XM_014211962.1](https://www.ncbi.nlm.nih.gov/nuccore/XM_014211962.1) | ggtgctcatagctgtgttgtc | tacacacaatgtccaggccc | 161 |
| NOS2 | [XM_014214975.1](https://www.ncbi.nlm.nih.gov/nuccore/XM_014214975.1) | tctcttcctgggctctcacc | gaaagtgctgtgatgcggtc | 169 |
| PTX3 | XM_014163494.1 | actggagcccacagcta | aagcatgttctccctcatctg | 112 |
| SAP | XM_014199767.1 | gtgtaggccgtcactacctc | tggaaaacgccctcttgaca | 150 |

Supplementary Table S3. Interleukin Expression at 7 dpi

| Description | Gene ID | Chromosome | p-adj | Log2FC |
| --- | --- | --- | --- | --- |
| IL-1β | 106570815 | ssa15 | 0.00 | -2.6 |
|  | 106562915 | ssa11 | 0.02 | -1.2 |
|  | 100136449 | ssa24 | 0.00 | -2.0 |
| IL-8 | 100195681 | ssa06 | 0.00 | -1.7 |
| IL-11 | 106575827 | ssa02 | 0.01 | -2.3 |
| IL-12β | 106603888 | ssa04 | 0.01 | -1.9 |
|  | 106612126 | ssa09 | 0.02 | -1.6 |
| IL-15 | 101448031 | ssa04 | 0.01 | -1.2 |
| IL-17F | 106600843 | ssa01 | 0.00 | -3.4 |
|  | 106571057 | ssa15 | 0.00 | -2.4 |
| IL-18 | 100196379 | ssa20 | 0.00 | -1.4 |
| IL-27β | 106574502 | ssa16 | 0.00 | 12.4 |
| IL-34 | 106560860 | ssa10 | 0.04 | -0.7 |
|  | 106573710 | ssa16 | 0.04 | -1.3 |

Supplementary Table S4. Top 100 up-regulated genes at 7 dpi

| Gene ID | Description | log2FC | p-adj |
| --- | --- | --- | --- |
| 106572058 | mannan binding lectin serine peptidase 2 | 30.0 | 0.000 |
| 106577959 | butyrophilin subfamily 2 member A1-like | 29.6 | 0.000 |
| 106562200 | aquaporin 9 | 29.5 | 0.000 |
| 106578604 | uncharacterized LOC106578604 | 25.4 | 0.000 |
| 106574351 | ladderlectin-like | 25.0 | 0.000 |
| 106575496 | ladderlectin-like | 17.2 | 0.000 |
| 106605344 | uncharacterized LOC106605344 | 16.4 | 0.000 |
| 106577960 | butyrophilin subfamily 2 member A1-like | 16.1 | 0.000 |
| 106597213 | uncharacterized LOC106597213 | 16.1 | 0.000 |
| 106599177 | complement factor H-like | 16.0 | 0.000 |
| 106563718 | liver-expressed antimicrobial peptide 2-like | 15.9 | 0.000 |
| 106561249 | myo-inositol oxygenase | 15.8 | 0.000 |
| 106573520 | zona pellucida sperm-binding protein 4-like | 15.7 | 0.000 |
| 100380442 | Coagulation factor IX | 15.6 | 0.000 |
| 106606371 | uncharacterized LOC106606371 | 15.6 | 0.000 |
| 106598425 | angiopoietin-related protein 3-like | 15.6 | 0.000 |
| 100136583 | pentraxin | 15.5 | 0.000 |
| 106577777 | transmembrane 4 L six family member 5 | 15.5 | 0.000 |
| 106581172 | alpha-2-antiplasmin-like | 15.5 | 0.000 |
| 106608633 | serum amyloid P-component-like | 15.5 | 0.000 |
| 106602848 | vitronectin-like | 15.3 | 0.000 |
| 106570190 | type-4 ice-structuring protein-like | 15.3 | 0.000 |
| 106575962 | solute carrier organic anion transporter family member 1C1-like | 15.3 | 0.000 |
| 106611125 | apolipoprotein B-100-like | 15.3 | 0.000 |
| 106607754 | protein LEG1 homolog | 15.2 | 0.000 |
| 106605127 | complement C3-like | 15.2 | 0.000 |
| 106585699 | alpha-1-antitrypsin-like | 15.2 | 0.000 |
| 106560591 | ceruloplasmin | 15.2 | 0.000 |
| 106575751 | coagulation factor VII-like | 15.2 | 0.000 |
| 106605287 | type-4 ice-structuring protein LS-12-like | 15.2 | 0.000 |
| 106584303 | kininogen-1-like | 15.2 | 0.000 |
| 106605182 | fatty acid-binding protein 10-A, liver basic-like | 15.2 | 0.000 |
| 106579598 | complement C1q-like protein 3 | 15.2 | 0.000 |
| 106609962 | plasma protease C1 inhibitor-like | 15.1 | 0.000 |
| 106605687 | uncharacterized LOC106605687 | 15.1 | 0.000 |
| 106576012 | solute carrier organic anion transporter family member 1C1-like | 15.1 | 0.000 |
| 106610899 | uncharacterized LOC106610899 | 15.1 | 0.000 |
| 106577517 | uncharacterized LOC106577517 | 15.1 | 0.000 |
| 100136400 | secreted phosphoprotein 2 | 15.1 | 0.000 |
| 100380781 | zona pellucida sperm-binding protein 3 | 15.1 | 0.000 |
| 106607361 | insulin-like growth factor-binding protein complex acid labile subunit | 15.1 | 0.000 |
| 106607797 | plasminogen-like | 15.1 | 0.000 |
| 106560506 | uncharacterized LOC106560506 | 15.1 | 0.000 |
| 106602564 | fibrinogen gamma chain-like | 15.1 | 0.000 |
| 106575464 | solute carrier family 2, facilitated glucose transporter member 2-like | 15.1 | 0.000 |
| 106611802 | saxitoxin and tetrodotoxin-binding protein 1-like | 15.0 | 0.000 |
| 106612536 | alpha-2-macroglobulin-like | 15.0 | 0.000 |
| 106604501 | ribonuclease-like 3 | 15.0 | 0.000 |
| 106560386 | transthyretin | 15.0 | 0.000 |
| 106585643 | beta-2-glycoprotein 1-like | 15.0 | 0.000 |
| 106582922 | fatty acid-binding protein 10-A, liver basic | 15.0 | 0.000 |
| 106602969 | coagulation factor IX | 15.0 | 0.000 |
| 106560588 | histidine-rich glycoprotein-like | 14.9 | 0.000 |
| 106598792 | alpha-2-HS-glycoprotein-like | 14.9 | 0.000 |
| 106576886 | hyaluronan binding protein 2 | 14.9 | 0.000 |
| 106571137 | complement C1q-like protein 2 | 14.8 | 0.000 |
| 100136573 | apolipoprotein A-I | 14.8 | 0.000 |
| 100136575 | serum albumin 1 | 14.8 | 0.000 |
| 106585599 | uncharacterized LOC106585599 | 14.8 | 0.000 |
| 106569257 | selenoprotein Pb-like | 14.8 | 0.000 |
| 106566219 | complement C1q-like protein 2 | 14.8 | 0.000 |
| 106605688 | uncharacterized LOC106605688 | 14.8 | 0.000 |
| 106578170 | fibrinogen beta chain-like | 14.8 | 0.000 |
| 106564830 | complement C3-like | 14.8 | 0.000 |
| 106571178 | apolipoprotein B-100-like | 14.8 | 0.000 |
| 106573277 | fibroblast growth factor 23-like | 14.8 | 0.000 |
| 100136563 | protein AMBP | 14.8 | 0.000 |
| 106604583 | leukocyte cell-derived chemotaxin-2-like | 14.8 | 0.000 |
| 106564379 | transmembrane protease serine 6-like | 14.8 | 0.000 |
| 106568719 | angiopoietin-related protein 3-like | 14.7 | 0.000 |
| 106609451 | amidohydrolase domain containing 1 | 14.7 | 0.000 |
| 106572045 | properdin-like | 14.7 | 0.000 |
| 106578169 | fibrinogen alpha chain-like | 14.7 | 0.000 |
| 106580581 | glucokinase-like | 14.7 | 0.000 |
| 106580826 | complement C2-like | 14.7 | 0.000 |
| 106608112 | alpha-1-antitrypsin homolog | 14.7 | 0.000 |
| 106592810 | basement membrane-specific heparan sulfate proteoglycan core protein-like | 14.7 | 0.000 |
| 106574710 | solute carrier family 2, facilitated glucose transporter member 2-like | 14.7 | 0.000 |
| 106575753 | vitamin K-dependent protein Z-like | 14.7 | 0.000 |
| 106569366 | complement factor B-like | 14.7 | 0.000 |
| 100136922 | serum albumin 2 | 14.7 | 0.000 |
| 106568362 | complement C9 | 14.7 | 0.000 |
| 106573538 | uncharacterized LOC106573538 | 14.6 | 0.000 |
| 106585597 | uncharacterized LOC106585597 | 14.6 | 0.000 |
| 106568124 | complement C1q-like protein 2 | 14.6 | 0.000 |
| 106611733 | coagulation factor IX-like | 14.6 | 0.000 |
| 106563327 | succinyl-CoA:3-ketoacid coenzyme A transferase 1, mitochondrial-like | 14.6 | 0.000 |
| 106566833 | properdin-like | 14.6 | 0.000 |
| 100136579 | apolipoprotein B-100 | 14.6 | 0.000 |
| 106580206 | serpin family D member 1 | 14.6 | 0.000 |
| 106599887 | 5-beta-cholestane-3-alpha,7-alpha-diol 12-alpha-hydroxylase | 14.6 | 0.000 |
| 106560507 | uncharacterized LOC106560507 | 14.6 | 0.000 |
| 100196783 | Ethanolamine kinase 1 | 14.6 | 0.000 |
| 106561522 | protein AMBP-like | 14.5 | 0.000 |
| 106611039 | asialoglycoprotein receptor 1-like | 14.5 | 0.000 |
| 106581121 | fucolectin-6-like | 14.5 | 0.000 |
| 100195632 | Gap junction Cx32.2 protein | 14.5 | 0.000 |
| 106580921 | alpha-2-macroglobulin-like | 14.5 | 0.000 |
| 106575752 | coagulation factor X-like | 14.5 | 0.000 |
| 106585649 | complement C1q-like protein 2 | 14.5 | 0.000 |

Supplementary Table S5. Top 100 down-regulated genes at 7 dpi

| GeneID | Description | log2FC | p-adj |
| --- | --- | --- | --- |
| 106582495 | interferon-induced guanylate-binding protein 1-like | 7.5 | 0.000 |
| 106581364 | uncharacterized LOC106581364 | 6.5 | 0.000 |
| 106612333 | phytanoyl-CoA dioxygenase domain-containing protein 1-like | 6.3 | 0.000 |
| 100136358 | nitric oxide synthase 2 | 5.8 | 0.000 |
| 106607306 | uncharacterized protein C17orf104 homolog | 5.4 | 0.000 |
| 106604090 | uncharacterized LOC106604090 | 5.1 | 0.000 |
| 106607322 | uncharacterized LOC106607322 | 4.8 | 0.000 |
| 106583660 | CD276 antigen-like | 4.4 | 0.000 |
| 106568225 | S100 calcium binding protein Z | 4.3 | 0.000 |
| 106610051 | NADPH oxidase organizer 1-like | 4.2 | 0.000 |
| 106561469 | E3 ubiquitin/ISG15 ligase TRIM25-like | 4.1 | 0.000 |
| 106572795 | eosinophil peroxidase-like | 4.0 | 0.000 |
| 106611403 | alpha-2C adrenergic receptor-like | 3.9 | 0.005 |
| 106580712 | neutrophil cytosol factor 2-like | 3.9 | 0.000 |
| 106562747 | uncharacterized LOC106562747 | 3.9 | 0.030 |
| 106577151 | SH2 domain-containing protein 4B-like | 3.8 | 0.040 |
| 106609025 | heterogeneous nuclear ribonucleoprotein C-like | 3.7 | 0.009 |
| 106583609 | uncharacterized LOC106583609 | 3.6 | 0.000 |
| 106581372 | uncharacterized LOC106581372 | 3.5 | 0.009 |
| 106603239 | uncharacterized LOC106603239 | 3.5 | 0.000 |
| 106599381 | tandem C2 domains nuclear protein-like | 3.5 | 0.000 |
| 106610457 | interferon-induced very large GTPase 1-like | 3.5 | 0.000 |
| 106574553 | 2-oxoglutarate receptor 1-like | 3.5 | 0.000 |
| 106600843 | interleukin-17F-like | 3.4 | 0.000 |
| 106577820 | cytosolic phospholipase A2 gamma-like | 3.4 | 0.002 |
| 106573954 | uncharacterized LOC106573954 | 3.4 | 0.003 |
| 106602285 | hydroperoxide isomerase ALOXE3-like | 3.3 | 0.001 |
| 106600757 | uncharacterized LOC106600757 | 3.3 | 0.006 |
| 106612234 | ATPase phospholipid transporting 10B (putative) | 3.3 | 0.000 |
| 106585882 | C-C motif chemokine 4-like | 3.3 | 0.001 |
| 106604401 | SH2 domain-containing protein 4A-like | 3.2 | 0.000 |
| 106562991 | tubulin alpha chain, testis-specific | 3.2 | 0.007 |
| 106605244 | sorting nexin-9-like | 3.2 | 0.000 |
| 100136453 | cathelicidin | 3.2 | 0.000 |
| 106610462 | up-regulator of cell proliferation-like | 3.2 | 0.001 |
| 106609463 | fibroblast growth factor 23-like | 3.1 | 0.000 |
| 106564973 | E3 ubiquitin-protein ligase TRIM21-like | 3.1 | 0.000 |
| 106577994 | putative ferric-chelate reductase 1 | 3.1 | 0.007 |
| 106581616 | aconitate decarboxylase 1 | 3.1 | 0.000 |
| 106561474 | tripartite motif-containing protein 47-like | 3.1 | 0.003 |
| 106607304 | uncharacterized LOC106607304 | 3.1 | 0.000 |
| 106610514 | interferon-induced very large GTPase 1-like | 3.0 | 0.019 |
| 106611950 | gastrotropin-like | 3.0 | 0.002 |
| 106563734 | vascular endothelial growth factor C-like | 3.0 | 0.000 |
| 106612508 | uncharacterized LOC106612508 | 3.0 | 0.003 |
| 100196853 | Fibroblast growth factor-binding protein 1 | 2.9 | 0.000 |
| 106606647 | NADPH oxidase organizer 1-like | 2.9 | 0.000 |
| 106577138 | early growth response protein 2b-like | 2.9 | 0.000 |
| 106593505 | axin-1-like | 2.9 | 0.002 |
| 106612301 | uncharacterized LOC106612301 | 2.9 | 0.000 |
| 106584701 | uncharacterized LOC106584701 | 2.8 | 0.000 |
| 100195947 | E3 ubiquitin-protein ligase RNF138 | 2.8 | 0.000 |
| 106613110 | collagenase 3-like | 2.8 | 0.000 |
| 106574896 | cell surface A33 antigen-like | 2.8 | 0.011 |
| 106599435 | laminin subunit gamma 2 | 2.8 | 0.000 |
| 106569680 | C-C motif chemokine 20-like | 2.8 | 0.000 |
| 106600579 | von Willebrand factor A domain-containing protein 5B1-like | 2.8 | 0.002 |
| 106581246 | uncharacterized LOC106581246 | 2.8 | 0.000 |
| 106570886 | C-C motif chemokine 4-like | 2.8 | 0.024 |
| 106570668 | uncharacterized LOC106570668 | 2.8 | 0.000 |
| 106582885 | protein FAM110C-like | 2.8 | 0.000 |
| 106583108 | solute carrier family 45 member 3-like | 2.7 | 0.000 |
| 106576852 | ubiquitin domain-containing protein 1-like | 2.7 | 0.004 |
| 106574741 | cyclic nucleotide-gated channel cone photoreceptor subunit alpha-like | 2.7 | 0.022 |
| 106584298 | polymeric immunoglobulin receptor-like | 2.7 | 0.000 |
| 106581822 | glycerol-3-phosphate dehydrogenase 2 | 2.7 | 0.017 |
| 106572678 | receptor tyrosine-protein kinase erbB-3-like | 2.7 | 0.000 |
| 106575998 | putative interleukin-17 receptor E-like | 2.7 | 0.000 |
| 106609889 | sialic acid synthase-like | 2.7 | 0.000 |
| 106608946 | neurosecretory protein VGF-like | 2.7 | 0.000 |
| 106607746 | probable ribonuclease ZC3H12D | 2.7 | 0.000 |
| 106612300 | ES1 protein homolog, mitochondrial-like | 2.7 | 0.002 |
| 100196116 | Epigen | 2.7 | 0.005 |
| 106560558 | prostaglandin G/H synthase 2-like | 2.7 | 0.015 |
| 106586188 | dispanin subfamily A member 2b-like | 2.7 | 0.001 |
| 106580394 | L-serine dehydratase/L-threonine deaminase-like | 2.7 | 0.007 |
| 106587962 | transcription factor Sp6-like | 2.7 | 0.000 |
| 106608068 | otoferlin-like | 2.6 | 0.001 |
| 106601989 | monocarboxylate transporter 4-like | 2.6 | 0.003 |
| 106571998 | NAD kinase-like | 2.6 | 0.000 |
| 106607060 | phosphoinositide 3-kinase regulatory subunit 6-like | 2.6 | 0.003 |
| 106570815 | interleukin-1 beta-like | 2.6 | 0.001 |
| 106609599 | forkhead box protein J1-B-like | 2.6 | 0.001 |
| 106560392 | mucin-7-like | 2.6 | 0.007 |
| 106581914 | rho GTPase-activating protein 6-like | 2.6 | 0.009 |
| 106567483 | forkhead box protein I1-ema-like | 2.6 | 0.005 |
| 106574830 | dachshund homolog 1-like | 2.6 | 0.005 |
| 106605258 | neurexophilin-1-like | 2.6 | 0.007 |
| 106562935 | electrogenic sodium bicarbonate cotransporter 1-like | 2.5 | 0.000 |
| 106608493 | mucin-2-like | 2.5 | 0.024 |
| 106578254 | uncharacterized LOC106578254 | 2.5 | 0.000 |
| 106576762 | epithelial cell adhesion molecule | 2.5 | 0.009 |
| 106565524 | G-protein coupled receptor 84-like | 2.5 | 0.000 |
| 106570887 | uncharacterized LOC106570887 | 2.5 | 0.002 |
| 106579499 | uncharacterized serine-rich protein C215.13-like | 2.5 | 0.000 |
| 106579269 | nuclear receptor coactivator 7-like | 2.5 | 0.007 |
| 106570111 | protein S100-A11-like | 2.5 | 0.039 |
| 106565107 | prosaposin receptor GPR37L1-like | 2.5 | 0.001 |
| 106567923 | collagenase 3-like | 2.5 | 0.004 |
| 106571561 | galectin-3-like | 2.5 | 0.006 |
